# Supplementary material
Source: publisher figshare collection journal article supplement (https://tandf.figshare.com/ndownloader/files/17990912)
Supplement: Supplementary file 1 [file 17990912]

**Supplementary Tables**

| Table S1. RNA types represented in the TCGA expression data |  |
| --- | --- |
| RNA type | Freq |
| 3prime_overlapping_ncRNA | 32 |
| antisense | 5394 |
| bidirectional_promoter_lncRNA | 35 |
| IG_C_gene | 14 |
| IG_C_pseudogene | 9 |
| IG_D_gene | 33 |
| IG_J_gene | 18 |
| IG_J_pseudogene | 3 |
| IG_V_gene | 140 |
| IG_V_pseudogene | 181 |
| lincRNA | 7176 |
| macro_lncRNA | 1 |
| miRNA | 1448 |
| misc_RNA | 2207 |
| polymorphic_pseudogene | 37 |
| processed_pseudogene | 10113 |
| processed_transcript | 519 |
| protein_coding | 19632 |
| pseudogene | 18 |
| ribozyme | 8 |
| rRNA | 47 |
| rRNA_pseudogene | 490 |
| scaRNA | 49 |
| scRNA | 1 |
| sense_intronic | 877 |
| sense_overlapping | 178 |
| snoRNA | 940 |
| snRNA | 1872 |
| sRNA | 2 |
| TEC | 1039 |
| TR_C_gene | 6 |
| TR_D_gene | 3 |
| TR_J_gene | 73 |
| TR_J_pseudogene | 4 |
| TR_V_gene | 103 |
| TR_V_pseudogene | 33 |
| transcribed_processed_pseudogene | 473 |
| transcribed_unitary_pseudogene | 115 |
| transcribed_unprocessed_pseudogene | 812 |
| translated_processed_pseudogene | 1 |
| unitary_pseudogene | 73 |
| unprocessed_pseudogene | 2506 |
| vaultRNA | 1 |

Table S2

| Table S2. Cox-PH survival regression analysis results on 80 lincRNAs that have been previously indicated for survival associations | | | | | |
| --- | --- | --- | --- | --- | --- |
| Gene | ENSID | p-value | Cancer | PMID | TCGA |
| RP11-701P16.5 | ENSG00000251230 | 4.69E-04 | non-small cell lung cancer | 26183581 | No |
| RP11-21L23.2 | ENSG00000261578 | 3.51E-02 | non-small cell lung cancer | 26183581 | No |
| AC104134.2 | ENSG00000225420 | 7.73E-02 | non-small cell lung cancer | 26183581 | No |
| RP11-379F4.4 | ENSG00000240207 | 1.25E-01 | non-small cell lung cancer | 26183581 | No |
| RP11-21L23.2 | ENSG00000261578 | 3.20E-01 | non-small cell lung cancer | 26183581 | No |
| RP11-701P16.5 | ENSG00000251230 | 5.75E-01 | non-small cell lung cancer | 26183581 | No |
| RP11-379F4.4 | ENSG00000240207 | 5.89E-01 | non-small cell lung cancer | 26183581 | No |
| KCNK15-AS1 | ENSG00000244558 | 6.67E-01 | non-small cell lung cancer | 26183581 | No |
| AC104134.2 | ENSG00000225420 | 7.42E-01 | non-small cell lung cancer | 26183581 | No |
| KCNK15-AS1 | ENSG00000244558 | 8.27E-01 | non-small cell lung cancer | 26183581 | No |
| FOXD3-AS1 | ENSG00000230798 | 1.10E-01 | breast cancer | 26549855 | No |
| RP11-983P16.4 | ENSG00000257337 | 1.89E-01 | breast cancer | 26549855 | No |
| AC010729.1 | ENSG00000242540 | 2.58E-01 | breast cancer | 26549855 | No |
| AC015971.2 | ENSG00000228363 | 8.17E-01 | breast cancer | 26549855 | No |
| RP11-15A1.2 | ENSG00000267191 | 8.22E-01 | breast cancer | 26549855 | No |
| AC096574.4 | ENSG00000225057 | 8.78E-01 | breast cancer | 26549855 | No |
| AC012487.2 | ENSG00000214184 | 9.15E-01 | breast cancer | 26549855 | No |
| CASC8 | ENSG00000246228 | 4.76E-06 | pancreatic Adenocarcinoma | 31031865 | Yes |
| AP000254.8 | ENSG00000273271 | 3.85E-05 | pancreatic Adenocarcinoma | 31031865 | Yes |
| AC093895.1 | ENSG00000249001 | 1.13E-04 | colorectal cancer | 30510449 | Yes |
| CTD-2186M15.3 | ENSG00000272086 | 1.33E-04 | pancreatic Adenocarcinoma | 31031865 | Yes |
| RP5-890O3.9 | ENSG00000240731 | 1.95E-04 | pancreatic Adenocarcinoma | 31031865 | Yes |
| CTC-429P9.3 | ENSG00000269044 | 2.09E-04 | pancreatic Adenocarcinoma | 31031865 | Yes |
| LINC01089 | ENSG00000212694 | 2.23E-04 | pancreatic Adenocarcinoma | 31031865 | Yes |
| RUNX1-IT1 | ENSG00000159216 | 1.77E-02 | ovarian cancer | 28389671 | No |
| H19 | ENSG00000130600 | 1.36E-01 | ovarian cancer | 28389671 | No |
| HOTAIRM1 | ENSG00000233429 | 5.17E-01 | ovarian cancer | 28389671 | No |
| MALAT1 | ENSG00000251562 | 9.38E-01 | ovarian cancer | 28389671 | No |
| LINC02474 | ENSG00000228437 | 2.67E-04 | colorectal cancer | 30510449 | Yes |
| AC083967.1 | ENSG00000254337 | 3.75E-04 | colorectal cancer | 30510449 | Yes |
| RP5-1085F17.3 | ENSG00000260257 | 3.77E-04 | pancreatic Adenocarcinoma | 31031865 | Yes |
| AC010789.1 | ENSG00000224817 | 3.96E-04 | colorectal cancer | 30510449 | Yes |
| LINC01006 | ENSG00000182648 | 7.62E-04 | endometrial carcinoma | 29304762 | Yes |
| LINC00941 | ENSG00000235884 | 1.28E-03 | pancreatic Adenocarcinoma | 31031865 | Yes |
| AC003101.2 | ENSG00000278546 | 1.86E-03 | colorectal cancer | 30510449 | Yes |
| NRAV | ENSG00000248008 | 2.10E-03 | endometrial carcinoma | 29304762 | Yes |
| MIR4435-2HG | ENSG00000172965 | 2.26E-03 | pancreatic Adenocarcinoma | 31031865 | Yes |
| LINC00460 | ENSG00000233532 | 2.69E-03 | head and neck squamous cell carcinoma | 28109476 | Yes |
| UCA1 | ENSG00000214049 | 2.88E-03 | pancreatic Adenocarcinoma | 31031865 | Yes |
| AP001347.6 | ENSG00000224905 | 3.57E-03 | endometrial carcinoma | 29304762 | Yes |
| LUNAR1 | ENSG00000278090 | 1.12E-03 | colorectal cancer | 30396175 | No |
| SFTA1P | ENSG00000225383 | 9.97E-02 | colorectal cancer | 30396175 | No |
| DKFZp434J0226 | ENSG00000268460 | 2.35E-01 | colorectal cancer | 30396175 | No |
| OGFOD3 | ENSG00000181396 | 7.19E-01 | colorectal cancer | 30396175 | No |
| AC020891.2 | ENSG00000259306 | 3.60E-03 | colorectal cancer | 30510449 | Yes |
| CYTOR | ENSG00000222041 | 4.75E-03 | pancreatic Adenocarcinoma | 31031865 | Yes |
| LINC00324 | ENSG00000178977 | 5.95E-03 | non-small cell lung cancer | 30659574 | Yes |
| LINC01354 | ENSG00000231768 | 6.29E-03 | colorectal cancer | 30510449 | Yes |
| AC105219.2 | ENSG00000254548 | 6.86E-03 | colorectal cancer | 30510449 | Yes |
| PTPRD-AS1 | ENSG00000225706 | 1.52E-02 | ovarian cancer | 27074572 | Yes |
| FOXD3-AS1 | ENSG00000230798 | 1.53E-02 | colorectal cancer | 30510449 | Yes |
| DHRS4-AS1 | ENSG00000215256 | 1.98E-02 | non-small cell lung cancer | 30659574 | Yes |
| ABHD11-AS1 | ENSG00000225969 | 2.04E-02 | pancreatic Adenocarcinoma | 31031865 | Yes |
| AC016027.1 | ENSG00000225335 | 3.43E-02 | colorectal cancer | 30510449 | Yes |
| LOC284632 | ENSG00000230023 | 5.28E-02 | non-small cell lung cancer | 30659574 | Yes |
| GUSBP11 | ENSG00000228315 | 7.36E-02 | head and neck squamous cell carcinoma | 28109476 | Yes |
| ITGA9-AS1 | ENSG00000235257 | 7.76E-02 | non-small cell lung cancer | 30659574 | Yes |
| ACVR2B-AS1 | ENSG00000229589 | 8.92E-02 | endometrial carcinoma | 29304762 | Yes |
| HOXA11-AS | ENSG00000240990 | 9.90E-02 | non-small cell lung cancer | 30659574 | Yes |
| AC079612.1 | ENSG00000196758 | 9.98E-02 | colorectal cancer | 30510449 | Yes |
| AC073046.25 | ENSG00000235499 | 1.01E-01 | endometrial carcinoma | 29304762 | Yes |
| RP5-894A10.6 | ENSG00000270157 | 1.04E-01 | head and neck squamous cell carcinoma | 28109476 | Yes |
| AL590483.3 | ENSG00000279774 | 1.19E-01 | colorectal cancer | 30510449 | Yes |
| LINC02257 | ENSG00000238042 | 1.24E-01 | colorectal cancer | 30510449 | Yes |
| AL590483.1 | ENSG00000229960 | 1.35E-01 | colorectal cancer | 30510449 | Yes |
| DOCK9-AS2 | ENSG00000260992 | 1.44E-01 | endometrial carcinoma | 29304762 | Yes |
| AC004947.2 | ENSG00000233760 | 1.60E-01 | endometrial carcinoma | 29304762 | Yes |
| LA16c-325D7.2 | ENSG00000263280 | 1.93E-01 | esophageal squamous cell carcinoma | 29891973 | Yes |
| KTN1-AS1 | ENSG00000186615 | 1.99E-01 | head and neck squamous cell carcinoma | 28109476 | Yes |
| AC024581.1 | ENSG00000249894 | 2.03E-01 | colorectal cancer | 30510449 | Yes |
| RP11-307C12.11 | ENSG00000232093 | 2.07E-01 | ovarian cancer | 27074572 | Yes |
| LINC00173 | ENSG00000196668 | 2.11E-01 | esophageal squamous cell carcinoma | 29891973 | Yes |
| LINC00869 | ENSG00000277147 | 2.23E-01 | non-small cell lung cancer | 30659574 | Yes |
| GTF3C2-AS1 | ENSG00000234945 | 2.55E-01 | endometrial carcinoma | 29304762 | Yes |
| LINC00662 | ENSG00000261824 | 2.76E-01 | non-small cell lung cancer | 30659574 | Yes |
| RP11-531A24.5 | ENSG00000253636 | 4.54E-01 | endometrial carcinoma | 29304762 | Yes |
| AC067930.5 | ENSG00000279605 | 4.84E-01 | colorectal cancer | 30510449 | Yes |
| RP11-80H5.7 | ENSG00000240996 | 5.14E-01 | ovarian cancer | 27074572 | Yes |
| RP5-1172N10.2 | ENSG00000124486 | 7.35E-01 | esophageal squamous cell carcinoma | 29891973 | Yes |
| AC012531.1 | ENSG00000260597 | 7.97E-01 | colorectal cancer | 30510449 | Yes |
